# Supplementary material for: Sustainability analysis of Finnish pre-schoolers’ diet based on targets of the EAT-Lancet reference diet
Source: Springer Nature journal article supplement (doi:10.1007/s00394-021-02672-3), 2021-09-15
Supplement: MOESM1 [file 19665290]

## Supplementary material

**Article title** Sustainability analysis of Finnish pre-schoolers' diet based on targets of the EAT-*Lancet* reference diet

**Journal name** European Journal of Nutrition

**Author names** Sari Bäck, Essi Skaffari, Henna Vepsäläinen, Reetta Lehto, Elviira Lehto, Kaija Nissinen, Carola Ray, Jaakko Nevalainen, Eva Roos, Maijaliisa Erkkola and Liisa Korkalo<sup>a</sup>

<sup>a</sup> Corresponding author; University of Helsinki, Helsinki, Finland, e-mail: liisa.korkalo@helsinki.fi

### Contents

**Table S1** Examples of manually assigned recipes for the food products

**Table S2** Foods and ingredients from the children's food records collected in the DAGIS study that were included in each food group of the EAT-*Lancet* reference diet

**Table S3** Foods and ingredients from the children's food records collected in the DAGIS study that were excluded from the analyses

**Table S4** Daily food group consumption of 3- to 4-year-old Finnish children in the cross-sectional DAGIS study compared with the EAT-*Lancet* reference diet's target ranges

**Table S5** Daily food group consumption of 5- to 6-year-old Finnish children in the cross-sectional DAGIS study compared with the EAT-*Lancet* reference diet's target ranges

**Table S1** Examples of manually assigned recipes for the food products

| Food product                                           | Recipe <sup>a</sup> (multipliers and food groups)                       |
|--------------------------------------------------------|-------------------------------------------------------------------------|
| Rye bread, brand A                                     | 0.58 whole grains; 0.05 tubers and starchy vegetables                   |
| Rye bread, brand B                                     | 0.56 whole grains                                                       |
| Rye bread, brand C                                     | 0.45 whole grains                                                       |
| Rye crispbread                                         | 0.90 whole grains                                                       |
| Multigrain bread (incl. wheat and rye), brand A        | 0.03 whole grains                                                       |
| Multigrain bread (incl. wheat and oat), brand B        | 0.15 whole grains                                                       |
| Multigrain bread (incl. multigrain and seeds), brand C | 0.05 whole grains; 0.12 nuts                                            |
| Multigrain flour (incl. wheat and rye)                 | 0.25 whole grains                                                       |
| Oat drink                                              | 0.1 whole grains                                                        |
| French fries, frozen                                   | 0.96 tubers and starchy vegetables; 0.04 unsaturated oils               |
| Potato chips                                           | 0.70 tubers and starchy vegetables; 0.30 unsaturated oils               |
| Instant mashed potato powder                           | 0.89 tubers and starchy vegetables; 0.08 dairy foods                    |
| Tomato ketchup                                         | 0.60 vegetables                                                         |
| Jam from berries or fruits                             | 0.40 fruits                                                             |
| Yoghurt incl. fruit or berry                           | 0.85 dairy foods; 0.06 fruits                                           |
| Ice cream                                              | 0.85 dairy foods                                                        |
| Pudding                                                | 0.86 dairy foods                                                        |
| Minced meat (mixed from pork and beef)                 | 0.4 beef; 0.6 pork                                                      |
| Sausage, brand A                                       | 0.1 beef; 0.5 pork; 0.1 poultry                                         |
| Sausage, brand B                                       | 0.1 beef; 0.2 pork; 0.2 poultry                                         |
| Sausage, brand C                                       | 0.1 beef; 0.3 pork; 0.1 poultry                                         |
| Ham, sliced                                            | 0.83 pork                                                               |
| Chicken fillet, marinated                              | 0.72 poultry; 0.05 unsaturated oils                                     |
| Pea soup, canned                                       | 0.06 pork; 0.4 legumes; 0.03 saturated fats (lard or tallow)            |
| Soy drink, brand A                                     | 0.07 legumes                                                            |
| Soy drink, brand B                                     | 0.06 legumes                                                            |
| Cocoa biscuit with vanilla flavoured filling           | 0.04 dairy foods; 0.17 saturated fats (palm oil); 0.04 unsaturated oils |
| Cooking cream                                          | 0.3 dairy foods; 0.07 saturated fats (palm oil); 0.07 unsaturated oils  |
| Fat spread, brand A                                    | 0.2 saturated fats (palm oil); 0.4 unsaturated oils                     |
| Fat spread, brand B                                    | 0.15 saturated fats (palm oil); 0.48 unsaturated oils                   |
| Fat spread, brand C                                    | 0.51 dairy foods; 0.24 unsaturated oils                                 |

<sup>a</sup> The recipe includes only the food groups of the reference diet that were used for preparation of foods. Each food group is preceded with the multiplier, e.g. 0.58 whole grains = 58% of the weight of the food product is assigned to the food group whole grains. The recipe comprises only the main ingredients of the food product and leaves out food groups not included in the reference diet, e.g. refined grains. Therefore, summing the factors in the recipe leads to a result of less than 1.

**Table S2** Foods and ingredients from the children’s food records collected in the DAGIS study that were included in each food group of the EAT-*Lancet* reference diet

| EAT- <i>Lancet</i> reference diet’s food group; form <sup>a</sup>                        | Foods and ingredients included in our analyses; form                                                                                                                                                                                                                                                                       |
|------------------------------------------------------------------------------------------|----------------------------------------------------------------------------------------------------------------------------------------------------------------------------------------------------------------------------------------------------------------------------------------------------------------------------|
| Whole grains; raw                                                                        | Whole-grain barley and rye, whole-grain wheat, dark wheat flour (fibre-rich non-whole grain) in dark macaroni, whole-grain rice, dark rice (outer shell layer removed), oat, millet, buckwheat, quinoa; mainly raw<br>Maize ears, maize kernels, popcorn; either raw or cooked<br>Oat from plant-based drinks and yoghurts |
| Tubers and starchy vegetables; raw                                                       | Mainly peeled potatoes; raw<br>French fries, potato chips, mashed potato powder, potato starch                                                                                                                                                                                                                             |
| Vegetables; raw/baked/boiled (includes dark green, orange and red, and other vegetables) | Root and leaf vegetables, fruit vegetables and other vegetables; raw<br>Ketchup, tomato crush and paste, pickles                                                                                                                                                                                                           |
| Fruits; raw                                                                              | Fruits and berries; raw (fresh)<br>Canned fruits, puree, jam, fruits and berries in dairy products, dried fruits                                                                                                                                                                                                           |
| Dairy foods (in milk equivalents)                                                        |                                                                                                                                                                                                                                                                                                                            |
| Dairy products (milk equivalent factor 1.0 <sup>b</sup> )                                | Fat content below 15% (whole milk, skimmed milk, sour milk, kefir, yoghurt, Finnish cultured milk, curd, pudding, cottage cheese, cooking cream, vanilla sauce, ice cream, milk cocoa, milk powder)                                                                                                                        |
| Cream (milk equivalent factor 2.7 <sup>b</sup> )                                         | Fat content 15% or higher: cream, creme fraiche, sour cream                                                                                                                                                                                                                                                                |
| Cheese (milk equivalent factor 5.0 <sup>b</sup> )                                        | Fat content 15% or higher: edam, emmental, gouda, feta, mozzarella, cheddar, halloumi, cheese spread                                                                                                                                                                                                                       |
| Butter (milk equivalent factor 6.5 <sup>b</sup> )                                        | Butter, includes butter in fat spreads (margarine and fat mixes) and shortenings                                                                                                                                                                                                                                           |
| Beef and lamb; raw                                                                       | Minced and whole meat of beef and lamb; mainly raw<br>Beef and lamb in processed meat: sausages, frankfurters, cold cuts, salami (incl. meat and ingredients comparable to meat)                                                                                                                                           |
| Pork; raw                                                                                | Minced and whole meat of pork; mainly raw<br>Pork in processed meat: sausages, frankfurters, cold cuts, salami (incl. meat and ingredients comparable to meat)                                                                                                                                                             |
| Chicken and other poultry; raw                                                           | Whole and minced meat of chicken, broiler and turkey; mainly raw<br>Chicken and turkey in processed meat: sausages, frankfurters, cold cuts, salami (incl. meat and ingredients comparable to meat)                                                                                                                        |
| Eggs; raw                                                                                | Egg; mainly raw<br>Egg included in pastry, biscuits, cookies or mayonnaise                                                                                                                                                                                                                                                 |

|                                   |                                                                                                                                                                                                                                                                                                                                                                                                                                                                         |
|-----------------------------------|-------------------------------------------------------------------------------------------------------------------------------------------------------------------------------------------------------------------------------------------------------------------------------------------------------------------------------------------------------------------------------------------------------------------------------------------------------------------------|
| Fish and seafood; dry heat cooked | Mainly fish fillets of salmon, saithe and rainbow trout; raw<br>Some amounts of cooked or smoked fish<br>Canned tuna, fish fingers without batter                                                                                                                                                                                                                                                                                                                       |
| Legumes; raw                      | Mainly green peas; fresh<br>Dried or cooked peas, beans and lentils<br>Peas included in frozen vegetable mixes<br>Soy protein concentrates, soy flour, soy groat; dry/raw<br>Cooked soybean and tofu<br>Soy from plant-based drinks and yoghurts                                                                                                                                                                                                                        |
| Nuts; raw/roasted                 | Peanuts, peanut butter<br>Tree nuts<br>Smaller amounts of almonds and seeds, also seeds in bread                                                                                                                                                                                                                                                                                                                                                                        |
| Saturated fats                    | Palm oil (for deep-frying)<br>Also palm oil included in fat products for baking, fat spreads (margarines and fat mixes), cooking creams, cookies, biscuits, savoury bakery products, popcorn, noodles<br>Chicken skin, lard                                                                                                                                                                                                                                             |
| Unsaturated oils                  | Olive oil, rapeseed oil, sunflower oil, flaxseed oil<br>Also included in fat spreads (margarines and fat mixes), cooking creams, dressings, mayonnaise, liquid vegetable oil products, bread, cookies, biscuits                                                                                                                                                                                                                                                         |
| Dairy fats                        | Included in the group dairy foods                                                                                                                                                                                                                                                                                                                                                                                                                                       |
| Added sugars                      | Sugar, honey<br>Also sugar added in berries, preserves, fruit and berry soups, conserves, smoothies, juice and soft drinks, breakfast cereal products, biscuits, cookies, cakes, pies, buns, doughnuts, pancakes, crêpes, porridge, rye/multigrain/wheat bread, milk-based drinks and desserts, yoghurt, ice cream, popsicles, oat- or soy-based drinks and products, almond drinks, sweets, chocolate, nuts, dried fruits, snacks, seasonings, spicy sauces, dressings |

<sup>a</sup> From Supplement to: Willett W, Rockström J, Loken B et al (2019) Food in the Anthropocene: the EAT–Lancet Commission on healthy diets from sustainable food systems. *Lancet*. [https://doi.org/10.1016/S0140-6736\(18\)31788-4](https://doi.org/10.1016/S0140-6736(18)31788-4). Accessed 7 Jan 2021

<sup>b</sup> From Wood A, Gordon LJ, Röss E et al (2019) Erratum: Nordic food systems for improved health and sustainability - baseline assessment to inform transformation. Stockholm Resilience Centre. [https://www.stockholmresilience.org/download/18.8620dc61698d96b1901719c/1561013818461/Erratum\\_Nordic%20report\\_14-6-19.pdf](https://www.stockholmresilience.org/download/18.8620dc61698d96b1901719c/1561013818461/Erratum_Nordic%20report_14-6-19.pdf). Accessed 7 Jan 2021

**Table S3** Foods and ingredients from the children’s food records collected in the DAGIS study that were excluded from the analyses

| Foods and ingredients    |                                                                                                                                                                                                                                                               |
|--------------------------|---------------------------------------------------------------------------------------------------------------------------------------------------------------------------------------------------------------------------------------------------------------|
| Refined grains           | Non-whole grains in bread, biscuits, cereals, flours, semolina and liquorice, bran<br>Non-whole grain macaroni and pasta (except dark macaroni made from fibre-rich non-whole grain dark wheat flour)<br>White rice, rice starch<br>Maize flour/starch/flakes |
| Game and offal           | Elk, liver, blood, blood sausage                                                                                                                                                                                                                              |
| Other meat               | Reindeer                                                                                                                                                                                                                                                      |
| Drinks <sup>a</sup>      | Juice drinks and soups, 100% juices, soft drinks, water, mineral water, tea, coffee                                                                                                                                                                           |
| Other foods <sup>a</sup> | Starch (except potato starch), salt, vinegar, seasonings, fish/vegetable/meat stock, yeast, mustard, sauce powders, soy sauce, meal and spicy sauces, coconut oil/flakes/milk, cocoa powder/butter/mass, food additives                                       |

<sup>a</sup> Other ingredients, except added sugars, were excluded from the analyses

**Table S4** Daily food group consumption of 3- to 4-year-old<sup>a</sup> Finnish children in the cross-sectional DAGIS study compared with the EAT-*Lancet* reference diet's target ranges

| Food group                                      | EAT- <i>Lancet</i> target, g/day <sup>b</sup> | EAT- <i>Lancet</i> target range, g/day <sup>b</sup> | Proportion of those below the target range, % | Proportion of those within the target range, % | Proportion of those above the target range, % |
|-------------------------------------------------|-----------------------------------------------|-----------------------------------------------------|-----------------------------------------------|------------------------------------------------|-----------------------------------------------|
| Carbohydrate sources                            |                                               |                                                     |                                               |                                                |                                               |
| Whole grains                                    | 122                                           | N/A                                                 | N/A                                           | N/A                                            | N/A                                           |
| Tubers and starchy vegetables                   | 26                                            | 0–52                                                | N/A                                           | 20                                             | 80                                            |
| Vegetables and fruits                           |                                               |                                                     |                                               |                                                |                                               |
| Vegetables                                      | 157                                           | 105–315                                             | 65                                            | 35                                             | 0                                             |
| Fruits                                          | 105                                           | 52–157                                              | 4                                             | 67                                             | 29                                            |
| Protein sources                                 |                                               |                                                     |                                               |                                                |                                               |
| Dairy foods (in milk equivalents <sup>c</sup> ) | 131                                           | 0–262                                               | N/A                                           | 3                                              | 97                                            |
| Red meat                                        | 7                                             | 0–15                                                | N/A                                           | 0                                              | 100                                           |
| Beef and lamb                                   | 4                                             | 0–7                                                 | N/A                                           | 2                                              | 98                                            |
| Pork                                            | 4                                             | 0–7                                                 | N/A                                           | 1                                              | 99                                            |
| Chicken and other poultry                       | 15                                            | 0–30                                                | N/A                                           | 92                                             | 8                                             |
| Eggs                                            | 7                                             | 0–13                                                | N/A                                           | 66                                             | 34                                            |
| Fish and seafood                                | 15                                            | 0–52                                                | N/A                                           | 100                                            | 0                                             |
| Legumes                                         | 39                                            | 0–79                                                | N/A                                           | 100                                            | 0                                             |
| Nuts                                            | 26                                            | 13–52                                               | 100                                           | 0                                              | 0                                             |
| Added fats                                      |                                               |                                                     |                                               |                                                |                                               |
| Saturated fats                                  | 6.2                                           | 0–6.2                                               | N/A                                           | 94                                             | 6                                             |
| Unsaturated oils                                | 21                                            | 10–42                                               | 32                                            | 68                                             | 0                                             |
| Dairy fats (included in dairy foods)            |                                               |                                                     |                                               |                                                |                                               |
| Added sugars                                    | 16                                            | 0–16                                                | N/A                                           | 8                                              | 92                                            |

N/A, not applicable

<sup>a</sup> Data from 460 participants including only the food record days when the child was 3–4 years old

<sup>b</sup> Assuming energy intake of 1311 kcal/day, which was the daily mean energy intake in the DAGIS study in the age group of 3- to 4-year-olds

<sup>c</sup> Includes dairy foods after conversion to milk equivalents (factors: milk 1.0, cream 2.7, cheese 5.0, butter 6.5 from Wood A, Gordon LJ, Rööös E et al (2019) Erratum: Nordic food systems for improved health and sustainability - baseline assessment to inform transformation. Stockholm Resilience Centre.

[https://www.stockholmresilience.org/download/18.8620dc61698d96b1901719c/1561013818461/Erratum\\_Nordic%20report\\_14-6-19.pdf](https://www.stockholmresilience.org/download/18.8620dc61698d96b1901719c/1561013818461/Erratum_Nordic%20report_14-6-19.pdf). Accessed 7 Jan 2021)

**Table S5** Daily food group consumption of 5- to 6-year-old<sup>a</sup> Finnish children in the cross-sectional DAGIS study compared with the EAT-*Lancet* reference diet's target ranges

| Food group                                      | EAT- <i>Lancet</i> target, g/day <sup>b</sup> | EAT- <i>Lancet</i> target range, g/day <sup>b</sup> | Proportion of those below the target range, % | Proportion of those within the target range, % | Proportion of those above the target range, % |
|-------------------------------------------------|-----------------------------------------------|-----------------------------------------------------|-----------------------------------------------|------------------------------------------------|-----------------------------------------------|
| Carbohydrate sources                            |                                               |                                                     |                                               |                                                |                                               |
| Whole grains                                    | 134                                           | N/A                                                 | N/A                                           | N/A                                            | N/A                                           |
| Tubers and starchy vegetables                   | 29                                            | 0–58                                                | N/A                                           | 21                                             | 79                                            |
| Vegetables and fruits                           |                                               |                                                     |                                               |                                                |                                               |
| Vegetables                                      | 174                                           | 116–348                                             | 66                                            | 34                                             | 0                                             |
| Fruits                                          | 116                                           | 58–174                                              | 6                                             | 65                                             | 29                                            |
| Protein sources                                 |                                               |                                                     |                                               |                                                |                                               |
| Dairy foods (in milk equivalents <sup>c</sup> ) | 145                                           | 0–290                                               | N/A                                           | 3                                              | 97                                            |
| Red meat                                        | 8                                             | 0–16                                                | N/A                                           | 0                                              | 100                                           |
| Beef and lamb                                   | 4                                             | 0–8                                                 | N/A                                           | 5                                              | 95                                            |
| Pork                                            | 4                                             | 0–8                                                 | N/A                                           | 3                                              | 97                                            |
| Chicken and other poultry                       | 17                                            | 0–34                                                | N/A                                           | 96                                             | 4                                             |
| Eggs                                            | 8                                             | 0–14                                                | N/A                                           | 69                                             | 31                                            |
| Fish and seafood                                | 16                                            | 0–58                                                | N/A                                           | 100                                            | 0                                             |
| Legumes                                         | 43                                            | 0–87                                                | N/A                                           | 100                                            | 0                                             |
| Nuts                                            | 29                                            | 14–58                                               | 100                                           | 0                                              | 0                                             |
| Added fats                                      |                                               |                                                     |                                               |                                                |                                               |
| Saturated fats                                  | 6.8                                           | 0–6.8                                               | N/A                                           | 95                                             | 5                                             |
| Unsaturated oils                                | 23                                            | 12–46                                               | 39                                            | 61                                             | 0                                             |
| Dairy fats (included in dairy foods)            |                                               |                                                     |                                               |                                                |                                               |
| Added sugars                                    | 18                                            | 0–18                                                | N/A                                           | 7                                              | 93                                            |

N/A, not applicable

<sup>a</sup> Data from 402 participants including only the food record days when the child was 5–6 years old

<sup>b</sup> Assuming energy intake of 1449 kcal/day, which was the daily mean energy intake in the DAGIS study in the age group of 5- to 6-year-olds

<sup>c</sup> Includes dairy foods after conversion to milk equivalents (factors: milk 1.0, cream 2.7, cheese 5.0, butter 6.5 from Wood A, Gordon LJ, Rööf E et al (2019) Erratum: Nordic food systems for improved health and sustainability - baseline assessment to inform transformation. Stockholm Resilience Centre.

[https://www.stockholmresilience.org/download/18.8620dc61698d96b1901719c/1561013818461/Erratum\\_Nordic%20report\\_14-6-19.pdf](https://www.stockholmresilience.org/download/18.8620dc61698d96b1901719c/1561013818461/Erratum_Nordic%20report_14-6-19.pdf). Accessed 7 Jan 2021)
